# Supplementary material
Source: PubMed Central journal article supplement (PMC3801035)
Supplement: 1307313110_pnas.201307313SI.pdf [file 1307313110_pnas.201307313SI.pdf]

# Supporting Information

Chakrabarti et al. 10.1073/pnas.1307313110

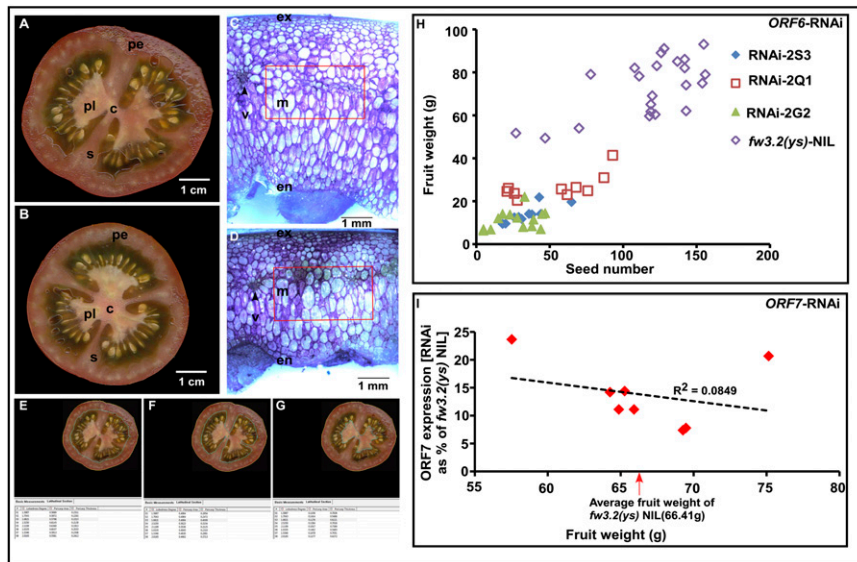

**Fig. S1.** Effect of *fruit weight 3.2* (*fw3.2*) on mature fruit structure, screenshots of different parts of fruits measured by TOMATO ANALYZER; fruit weight and seed number correlations in the nearly isogenic line (NIL) *fw3.2(ys)* and *ORF6* RNAi lines; fruit weight and *ORF7* transcript level in *ORF7* amiRNA lines. (A and B) Transverse section of the fruit from *fw3.2(ys)* and *fw3.2(wt)* NILs, respectively. (C and D) Pericarp cells of a transverse section of mature fruits from *fw3.2(ys)* and *fw3.2(wt)* NILs, respectively. Six large cells in the red box were used for cell measurements. Ten plants per genotype, two fruits per line, and two sections per fruit were used for the analysis. (E) Pericarp area surrounded by inner and outer pericarp boundaries. (F) Pericarp and septum area demarcated by outer pericarp boundary and inner pericarp boundary and septum. (G) Area covered by columella and placenta. (H) Fruit weight and total number of seeds per fruit were recorded for 10, 10, 14, and 22 fruits for RNAi-2S3, RNAi-2Q1, RNAi-2G2, and *fw3.2(ys)*, respectively. (I) Correlation of *ORF7* transcript accumulation and fruit size in *ORF7* amiRNA lines. Transcript level of *ORF7* in *ORF7* amiRNA lines were expressed as percentage of *ORF7* expression in *fw3.2(ys)* NIL. c, columella; en, endocarp; ex, exocarp; m, mesocarp; pe, pericarp; pl, placenta; s, septum; v, vascular bundle.

## Other Supporting Information Files

- [Table S1 \(DOCX\)](#)
- [Table S2 \(DOCX\)](#)
- [Table S3 \(DOCX\)](#)
- [Table S4 \(DOCX\)](#)
- [Table S5 \(DOCX\)](#)
- [Table S6 \(DOCX\)](#)
- [Table S7 \(DOCX\)](#)
- [Dataset S1 \(XLSX\)](#)
